# Supplementary material
Source: PubMed Central journal article supplement (PMC7532947)

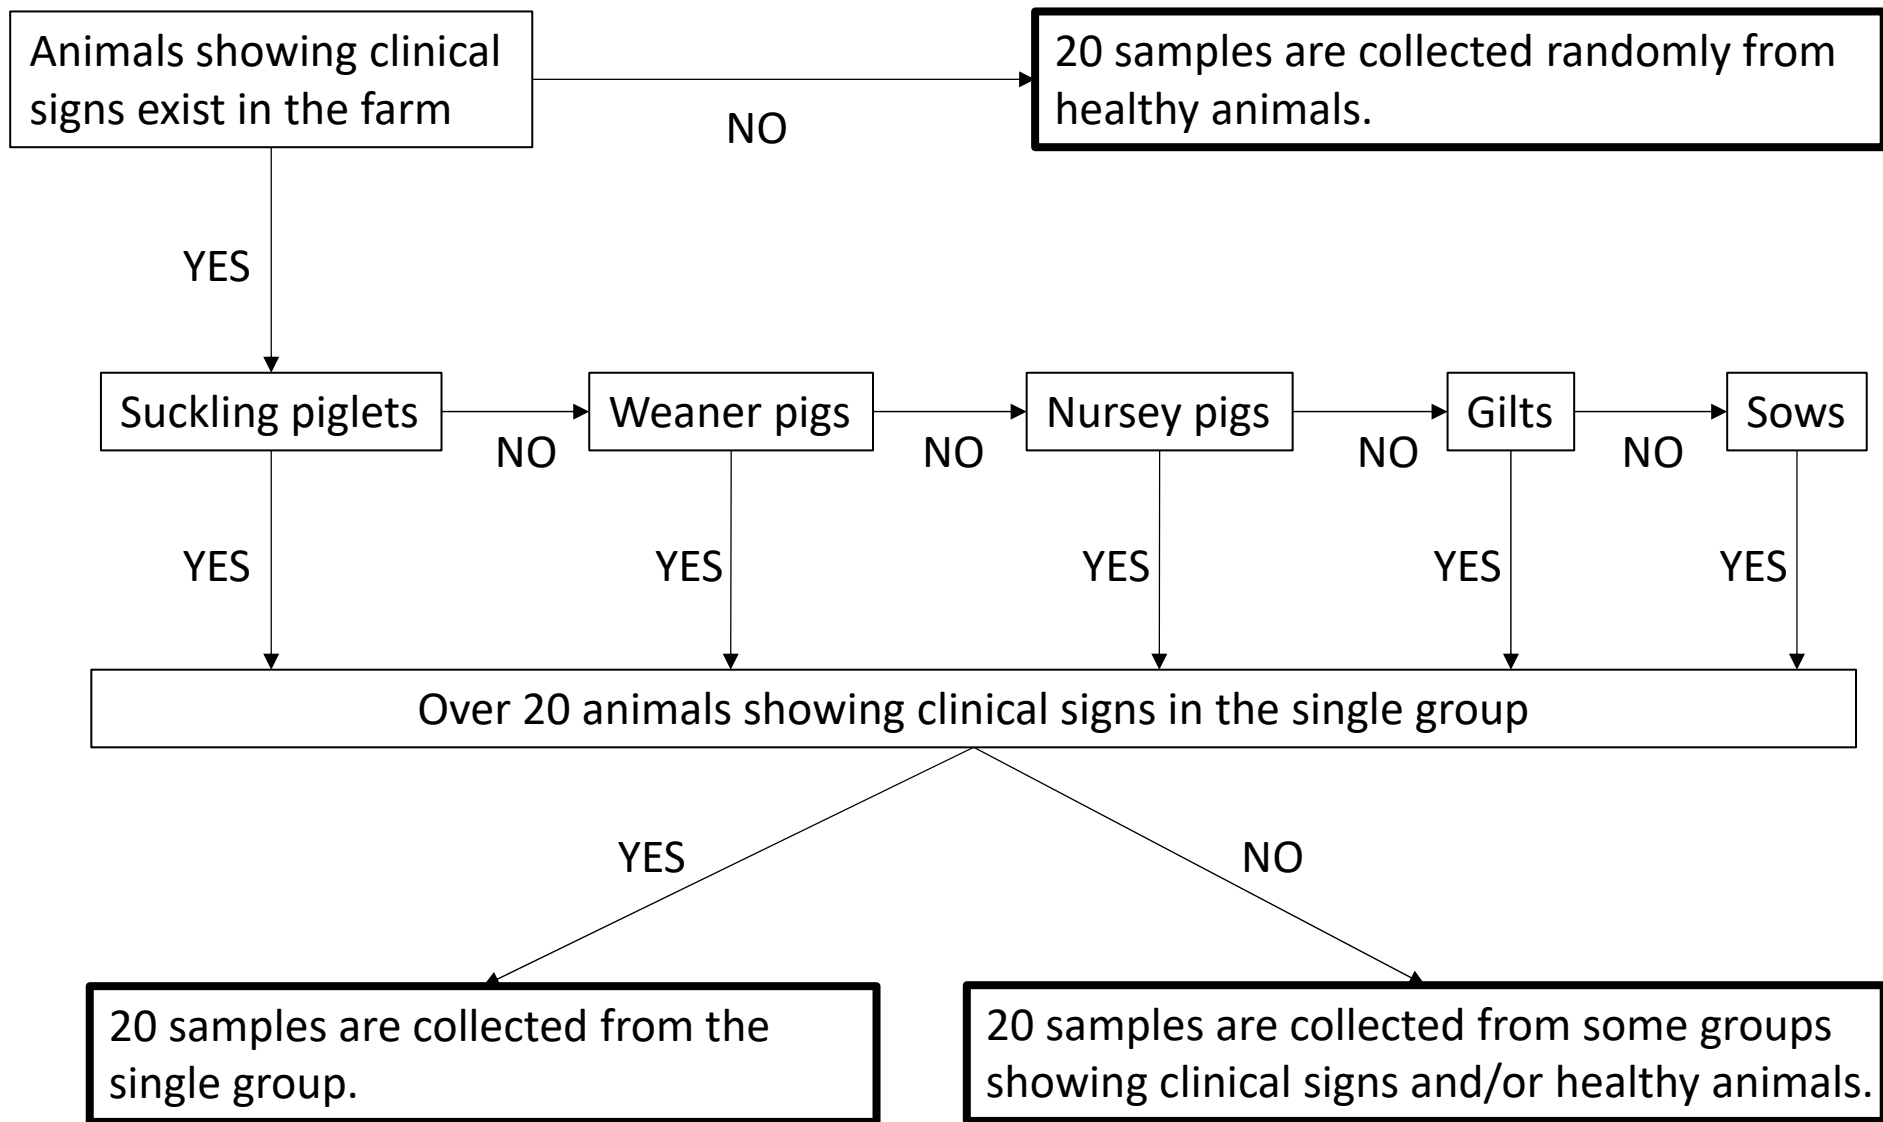

Supplement: 11250_2020_2416_MOESM1_ESM.pdf [file 11250_2020_2416_MOESM1_ESM.pdf]
